# Supplementary material for: Single-component lipid nanoparticles for engineering SOCS1 gene-silenced dendritic cells to boost tumor immunotherapy
Source: Royal Society of Chemistry journal article supplement (doi:10.1039/d2bm01549h), 2022-11-14
Supplement: d2bm01549h1.pdf [file d2bm01549h1.pdf]

Supporting Information

## **Single-component Lipid Nanoparticles for Engineering SOCS1 Gene-silenced Dendritic Cells to Boost Tumor Immunotherapy**

Zexuan Yu<sup>† a</sup>, Mengtong Wu<sup>† a</sup>, Yingshuang Huang<sup>a</sup>, Yishu Wang<sup>a</sup>, Yijun Chen<sup>a</sup>,  
Qiulin Long<sup>a</sup>, Ziming Lin<sup>a</sup>, Lingjing Xue<sup>a</sup>, Caoyun Ju<sup>\* a</sup>, Can Zhang<sup>\* a, b</sup>

<sup>a</sup> State Key Laboratory of Natural Medicines, Jiangsu Key Laboratory of Drug Discovery for Metabolic Diseases, Center of Advanced Pharmaceuticals and Biomaterials, China Pharmaceutical University, Nanjing 210009, P.R. China

<sup>b</sup> Chongqing Innovation Institute of China Pharmaceutical University, Chongqing 401135, China

\* Correspondence to:

Can Zhang, Ph.D., State Key Laboratory of Natural Medicines, Jiangsu Key Laboratory of Drug Discovery for Metabolic Diseases, Center of Advanced Pharmaceuticals and Biomaterials, China Pharmaceutical University, Nanjing, P.R. China

E-mail: zhangcan@cpu.edu.cn

Caoyun Ju, Ph.D., State Key Laboratory of Natural Medicines, Jiangsu Key Laboratory of Drug Discovery for Metabolic Diseases, Center of Advanced Pharmaceuticals and Biomaterials, China Pharmaceutical University, Nanjing, P.R. China

E-mail: jucaoyun@cpu.edu.cn

<sup>†</sup> Authors contributed equally to this work

## Supporting Figures

### List:

**Figure S1.** Scheme of OA2 lipid synthesis.

**Figure S2.** <sup>1</sup>H NMR spectra of OA2 lipid.

**Figure S3.** <sup>13</sup>C NMR spectra of OA2 lipid.

**Figure S4.** HRMS spectra of OA2 lipid.

**Figure S5.** Characterization of OA2 LPs and *in vitro* stability of OA2 LPs/SOCS1-siRNA.

**Figure S6.** TEM image of OA2 LPs/SOCS1-siRNA.

**Figure S7.** Determination the purity and maturity of BMDCs generated using Inaba method.

**Figure S8.** Apoptosis of BMDCs after incubation with lipo2000/siRNA and OA2 LPs/siRNA determined by the Annexin V-FITC/PI assay at 6 h, 12 h, 24 h, and 48 h.

**Figure S9.** CD11c expression on BMCDs after incubating BMDCs with Ova, OA2 LPs/SOCS1-siRNA, and OA2 LPs/SOCS1-siRNA + Ova.

**Figure S10.** Quantification of CD69 expression in OT-1 T cells after 48 h-incubation of DC vaccines by flow cytometry.

**Figure S11.** Quantification of intracellular IFN- $\gamma$ , TNF- $\alpha$  and GzmB in OT-1 T cells after 48 h-incubation with different DC formulations.

**Figure S12.** Cytotoxicity of spleen CD8<sup>+</sup> T cells against B16-Ova tumor cells as measured by release of lactate dehydrogenase.

**Figure S13.** Quantitative analysis of tumor-infiltrated MHCII<sup>+</sup> DCs.

**Figure S14.** Quantitative analysis of Ki67 expression of tumor-infiltrated CD3<sup>+</sup> CD8<sup>+</sup> T cells.

**Figure S15.** Representative flow cytometric images of IFN- $\gamma$ , GzmB, and TNF- $\alpha$  expression in CD3<sup>+</sup> CD8<sup>+</sup> T cells isolated from the tumor tissue after treatment.

**Figure S16.** Tumor prevention assay.

**Figure S17.** Quantification of LDH, AST, ALT, ALP, BUN and CRE in the plasma of the mice after treatment with indicated formulations.

**Figure S18.** Histological images of the H&E-stained organs collected from the mice treated with indicated formulations. Scale bar: 100  $\mu\text{m}$ .

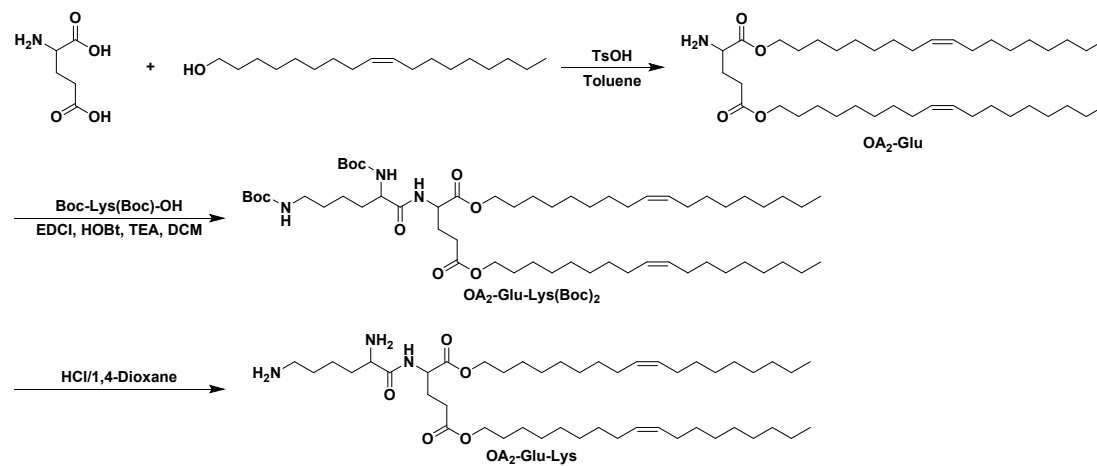

**Figure S1.** Scheme of OA<sub>2</sub> lipid synthesis.

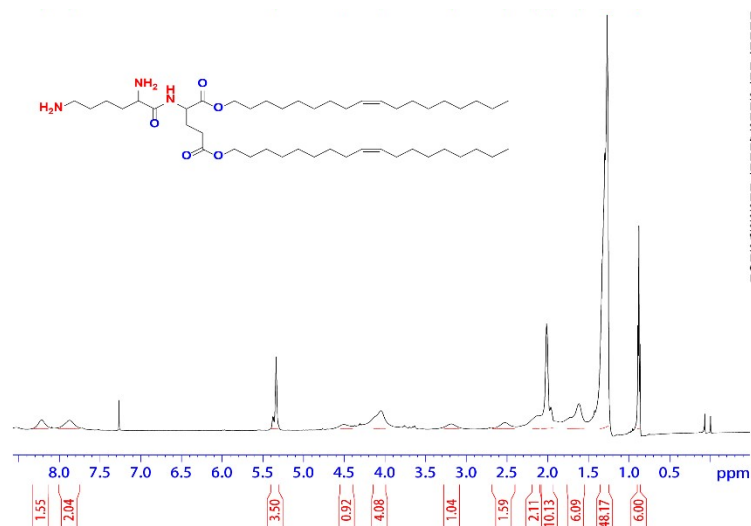

**Figure S2.** <sup>1</sup>H NMR spectra of OA2 lipid.

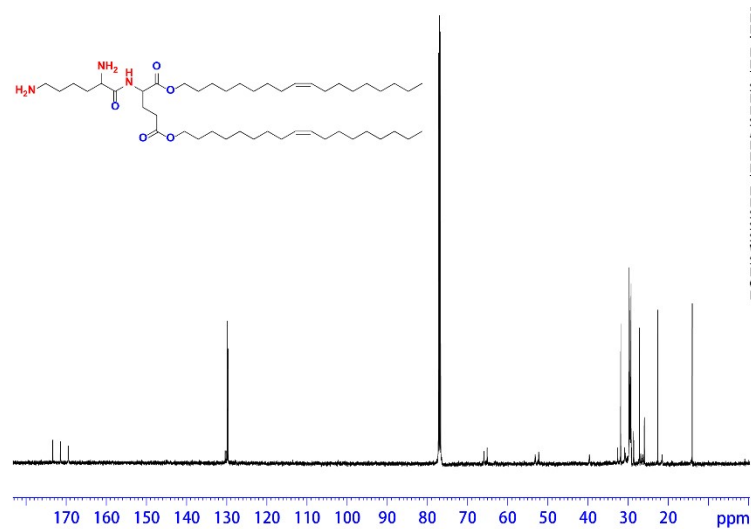

**Figure S3.** <sup>13</sup>C NMR spectra of OA2 lipid.

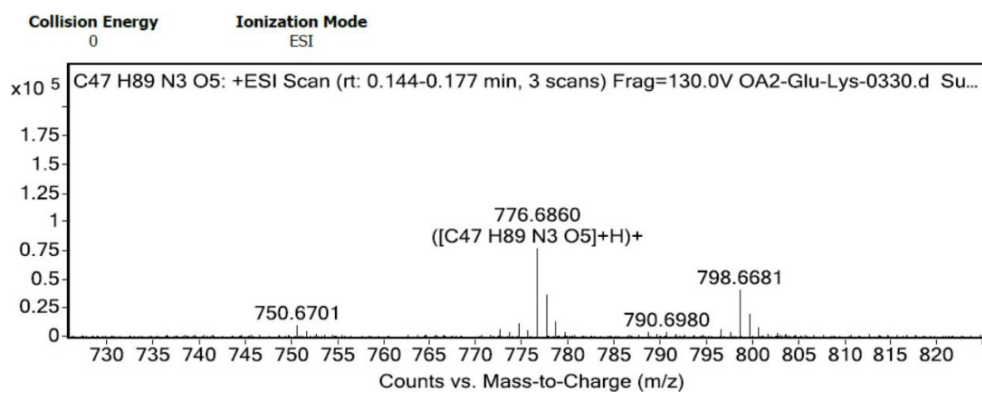

**Figure S4.** HRMS spectra of the OA2 lipid.

**A**

| Characterization    | OA2 LPs     |
|---------------------|-------------|
| Particle size (nm)  | 128.0 ± 0.1 |
| PDI                 | 0.14 ± 0.04 |
| Zeta potential (mV) | 43.2 ± 1.2  |

**B**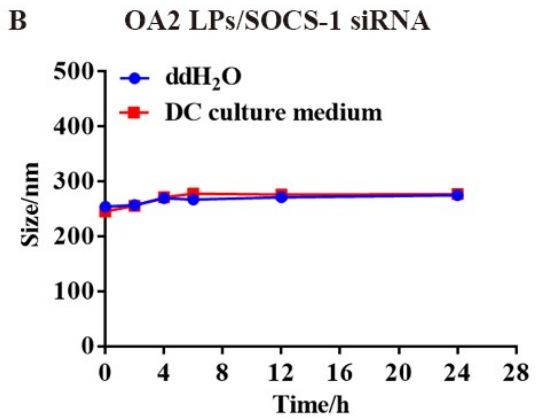

**Figure S5.** Characterization of OA2 LPs and *in vitro* stability of OA2 LPs/SOCS1-siRNA. (A) Mean particle sizes, PDI, and zeta potentials of OA2 LPs. (B) Change in the particle size of OA2 LPs/SOCS1-siRNA after incubation in the presence of ddH<sub>2</sub>O or DC culture medium over time (Mean ± SD, n = 3).

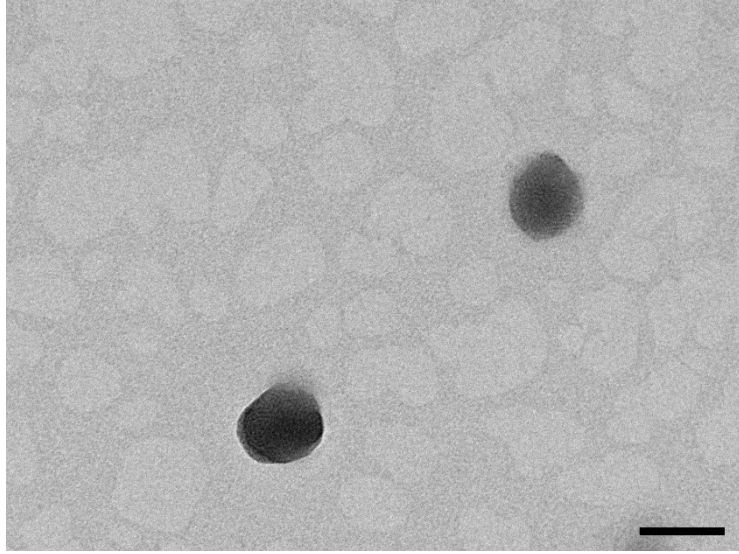

**Figure S6.** TEM image of OA2 LPs/SOCS1-siRNA. Bar: 100 nm.



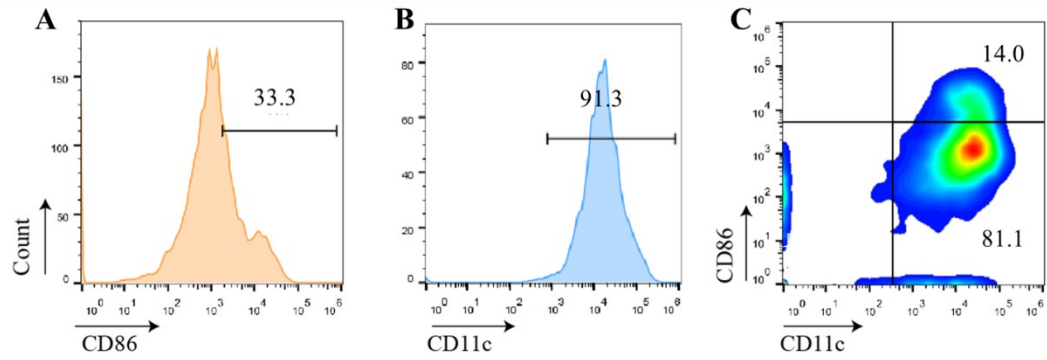

**Figure S7.** Determination the purity and maturity of BMDCs generated using Inaba method. (A) Purity of BMDCs. (B) Maturity of BMDCs. (C) Expression of CD11c and CD86 on BMDCs.

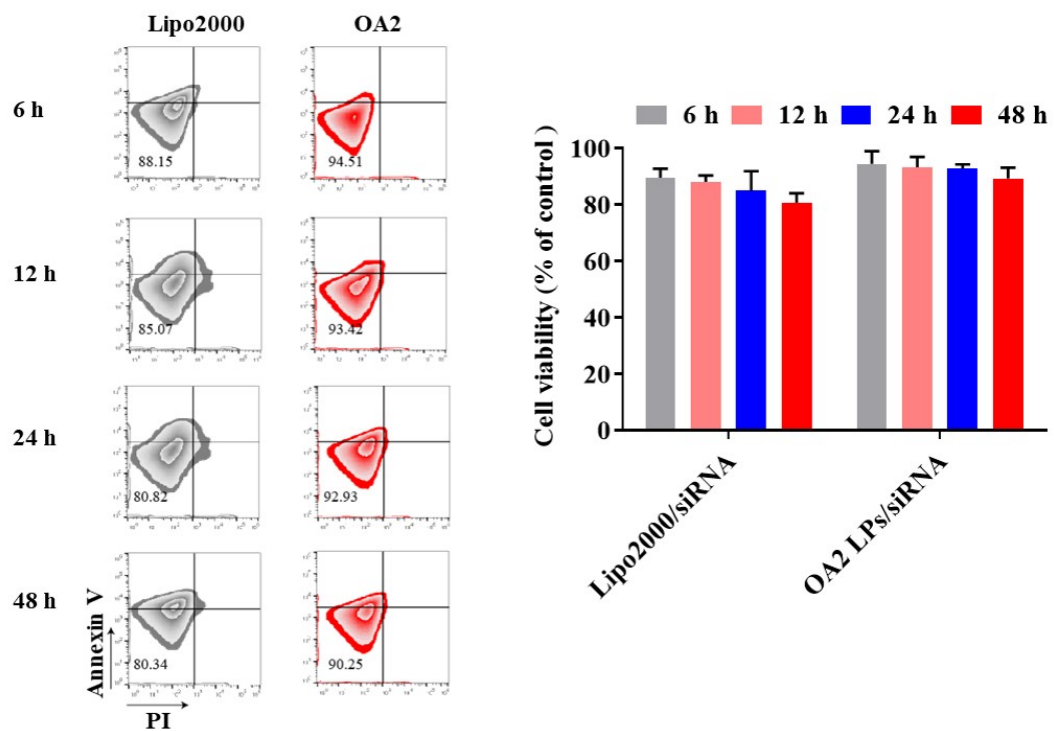

**Figure S8.** Apoptosis of BMDCs after incubation with lipo2000/siRNA and OA2 LPs/siRNA determined by the Annexin V-FITC/PI assay at 6 h, 12 h, 24 h, and 48 h (Mean  $\pm$  SD, n = 3).

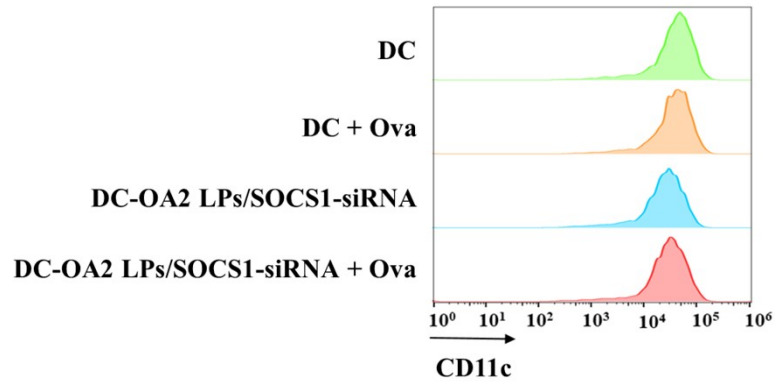

**Figure S9.** CD11c expression on BMCDs after incubating BMDCs with Ova, OA2 LPs/SOCS1-siRNA, and OA2 LPs/SOCS1-siRNA + Ova.

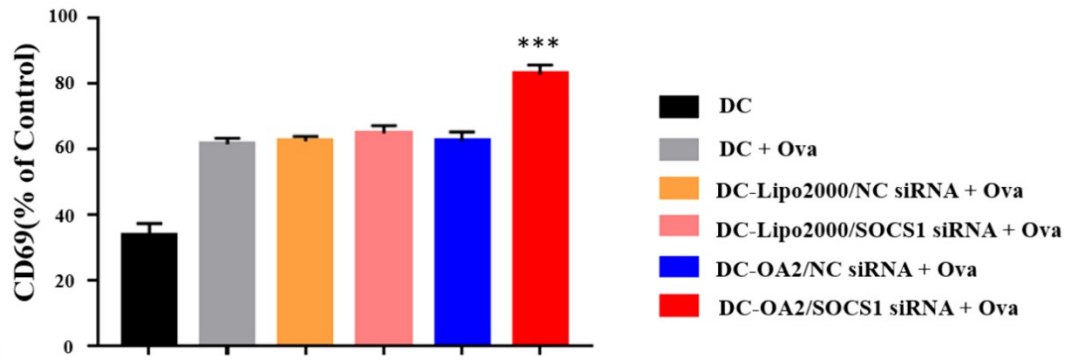

**Figure S10.** Quantification of CD69 expression in OT-1 T cells after 48 h-incubation of DC vaccines by flow cytometry (Mean  $\pm$  SD, n = 3).

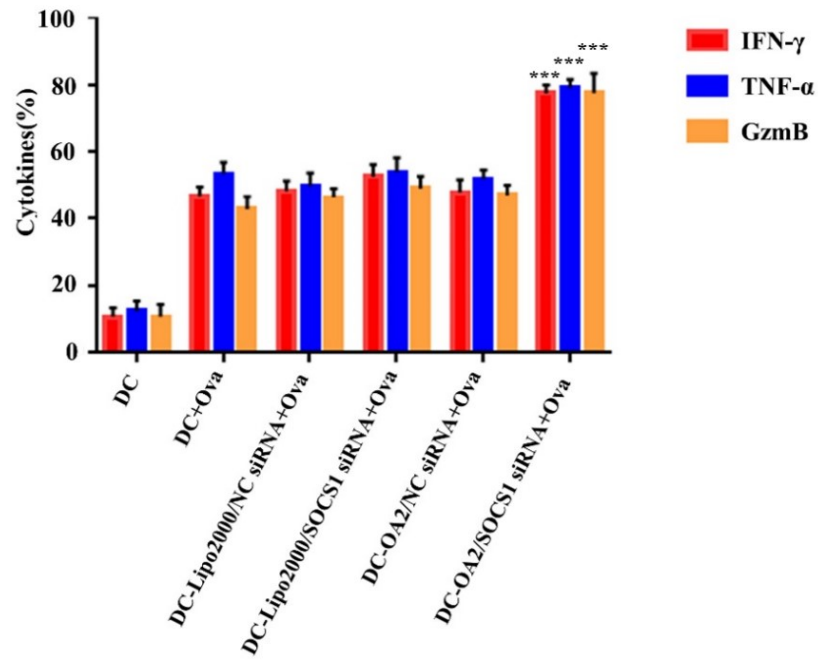

**Figure S11.** Quantification of intracellular IFN- $\gamma$ , TNF- $\alpha$  and GzmB in OT-1 T cells after 48 h-incubation with different DC formulations (Mean  $\pm$  SD, n=3).

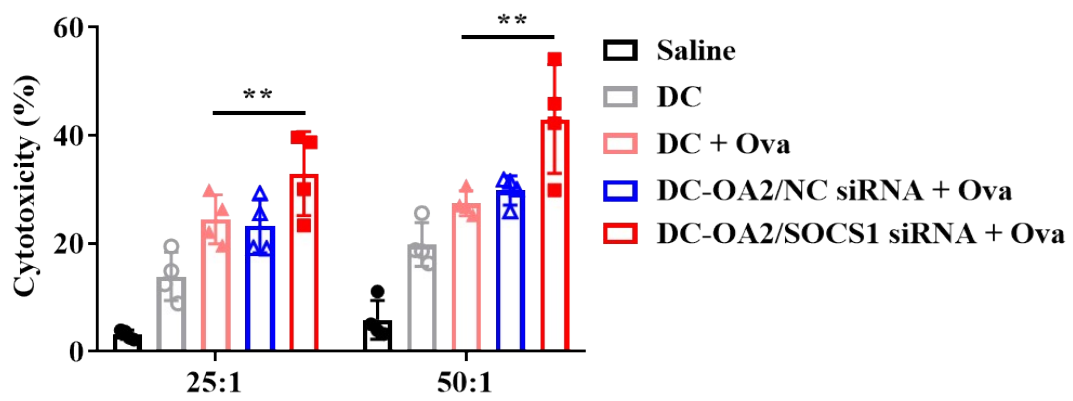

**Figure S12.** Cytotoxicity of spleen CD8<sup>+</sup> T cells against B16-Ova tumor cells as measured by release of lactate dehydrogenase (Mean  $\pm$  SD, n = 4).

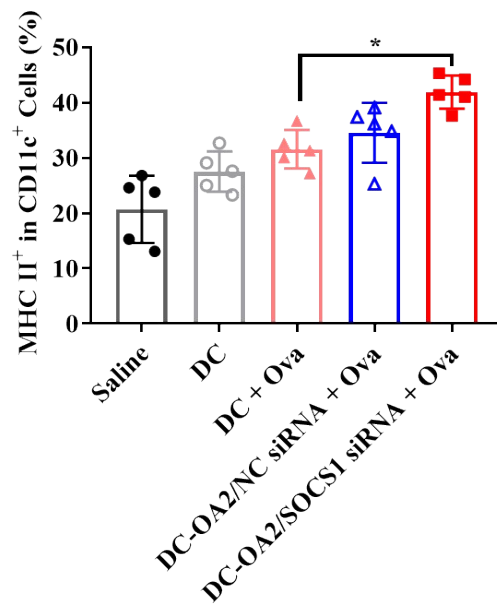

**Figure S13.** Quantitative analysis of tumor-infiltrated MHCII<sup>+</sup> DCs (Mean  $\pm$  SD, n = 5).

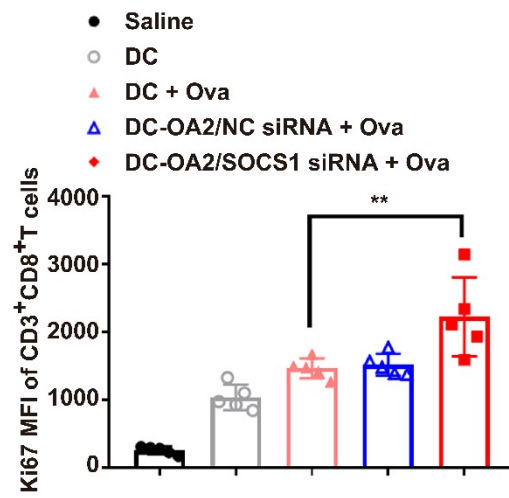

**Figure S14.** Quantitative analysis of Ki67 expression of tumor-infiltrated CD3<sup>+</sup> CD8<sup>+</sup> T cells. (Mean ± SD, n = 5).



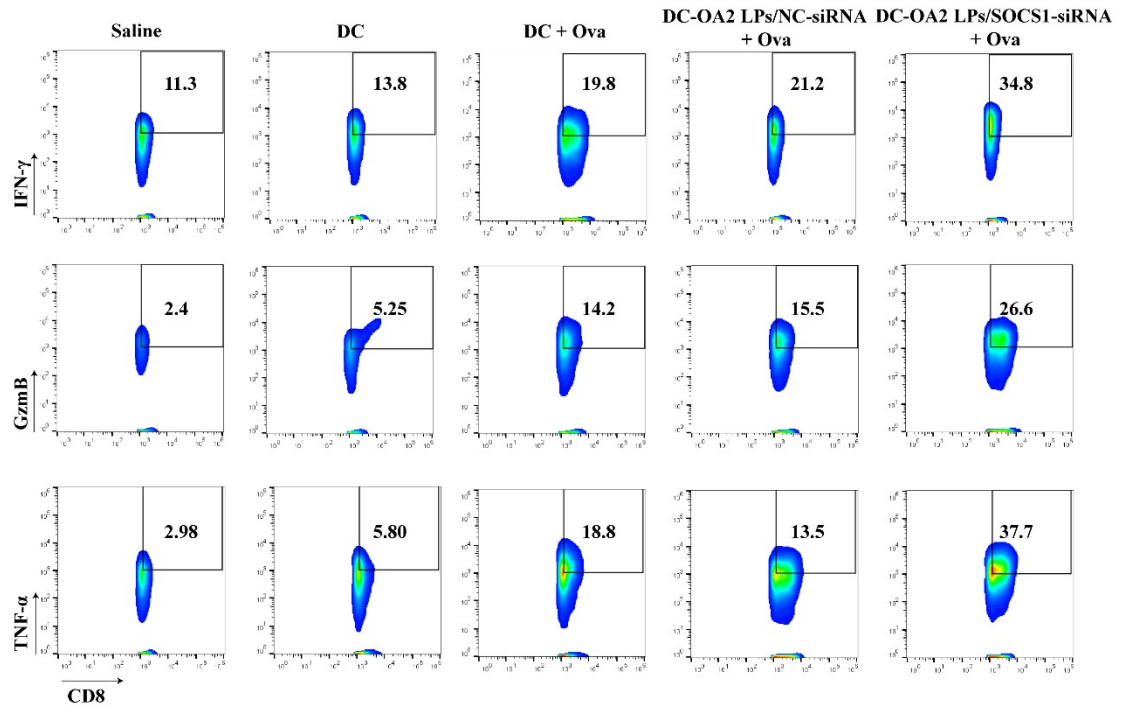

**Figure S15.** Representative flow cytometric images of IFN- $\gamma$ , GzmB, and TNF- $\alpha$  expression in CD3<sup>+</sup> CD8<sup>+</sup> T cells isolated from the tumor tissue after treatment.

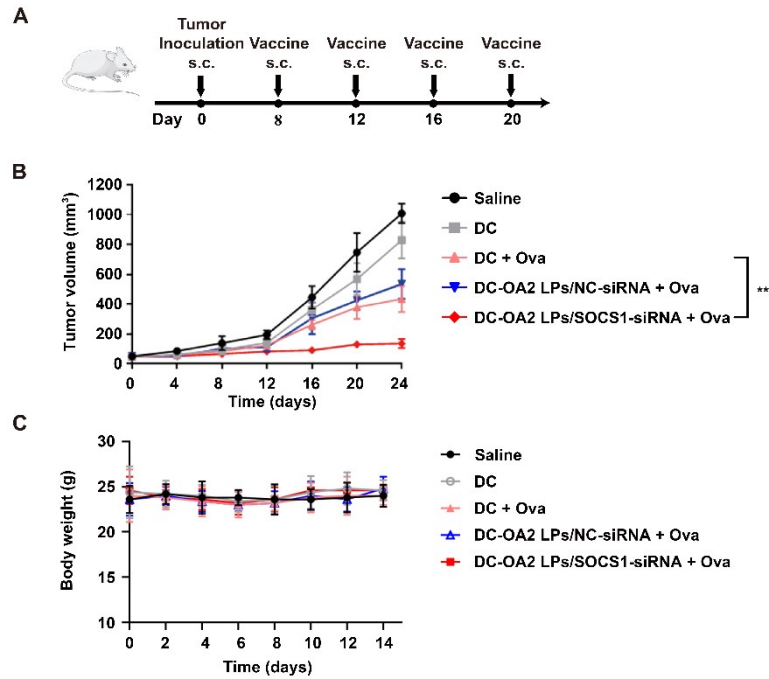

**Figure S16.** Tumor prevention assay. (A) Schematic illustration of the experimental design of tumor prevention. s.c., subcutaneous injection. (B) Tumor growth curves of immunized mice (Mean  $\pm$  SD, n = 5). (C) Change in the body weight of the mice during the tumor prevention assay (Mean  $\pm$  SD, n = 5).

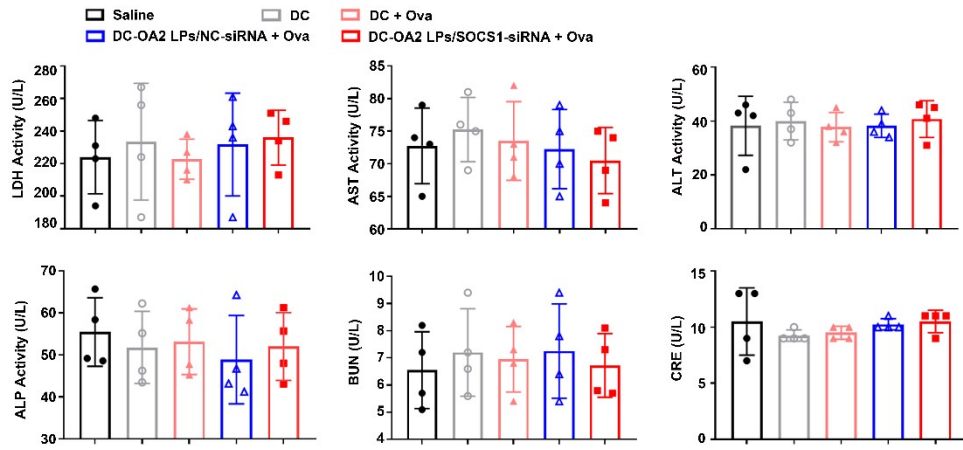

**Figure S17.** Quantification of LDH, AST, ALT, ALP, BUN and CRE in the plasma of the mice after treatment with indicated formulations (Mean  $\pm$  SD, n = 4).

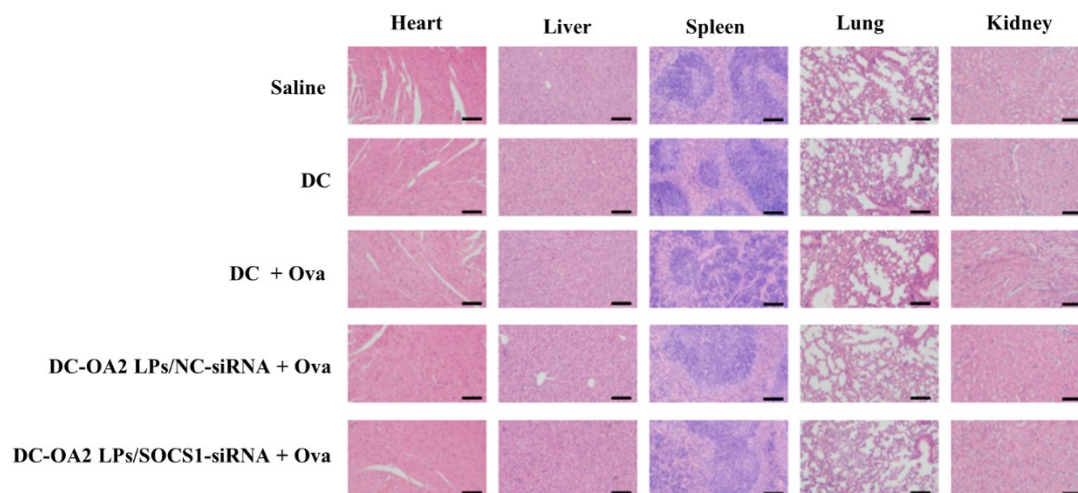

**Figure S18.** Histological images of the H&E-stained organs collected from the mice treated with indicated formulations. Scale bar: 100  $\mu\text{m}$ .

## Supporting Methods

### *Synthesis of OA2 lipid*

#### 1.1 Synthesis of OA2-Glu

A stirred solution of L-glutamic acid (5.00 g, 33.9 mmol) in toluene (200 mL) was added with *p*-toluenesulfonic acid (6.44 g, 37.4 mmol) followed by refluxing for 2 h at 140°C. Then, oleyl alcohol (19.2 g, 71.4 mmol) was added into the solution, followed by refluxing overnight at 150°C. The reaction mixture was evaporated with vacuum distillation to remove toluene and then dissolved in 300 mL Chloroform (CHCl<sub>3</sub>). The organic phase was sequentially washed with saturated NaHCO<sub>3</sub> solution (200 mL × 2) and brine (200 mL × 1), and then dried over anhydrous Na<sub>2</sub>SO<sub>4</sub>, followed by filtration and concentration. The residue was purified by silica gel column chromatography eluting with petroleum ether: ethyl acetate = 10:1, and dried to obtain the compound as a colorless transparent oily liquid (6.40 g, 54% yield). <sup>1</sup>H NMR (300 MHz, CDCl<sub>3</sub>): δ (ppm) 5.43-5.28 (m, 4H, CH<sub>2</sub>CHCHCH<sub>2</sub>), 4.17-4.01 (m, 4H, COOCH<sub>2</sub>), 3.52-3.44 (m, 1H, NH<sub>2</sub>CH), 2.46 (t, J = 7.2 Hz, 2H, CH<sub>2</sub>CO), 2.09-1.93 (m, 8H, CH<sub>2</sub>CHCHCH<sub>2</sub>), 1.77-1.70 (m, 2H, NH<sub>2</sub>CHCH<sub>2</sub>), 1.69-1.55 (m, 4H, COOCH<sub>2</sub>CH<sub>2</sub>). 1.35-1.22 (m, 44H, CH<sub>2</sub>(stearyl)), 0.88 (t, J = 6.7 Hz, 6H, CH<sub>2</sub>CH<sub>3</sub>). <sup>13</sup>C NMR (75 MHz, CDCl<sub>3</sub>): δ (ppm) 175.05 (1C, CH<sub>2</sub>COOCH<sub>2</sub>), 172.70 (1C, NH<sub>2</sub>CHCO), 129.47 (2C, CH<sub>2</sub>CHCHCH<sub>2</sub>), 129.25 (2C, CH<sub>2</sub>CHCHCH<sub>2</sub>), 64.73 (1C, COOCH<sub>2</sub>), 64.19 (1C, COOCH<sub>2</sub>), 53.26 (1C, NHCH), 31.40 (2C, CH<sub>2</sub>CH<sub>2</sub>CH<sub>3</sub>), 30.13 (1C, CH<sub>2</sub>COOCH<sub>2</sub>), 29.26 (4C, CH<sub>2</sub>CHCHCH<sub>2</sub>), 29.23 (2C, CH<sub>2</sub>(stearyl)), 29.19 (2C, CH<sub>2</sub>(stearyl)), 29.02 (2C, CH<sub>2</sub>(stearyl)), 28.91 (2C, CH<sub>2</sub>(stearyl)), 28.82 (6C, CH<sub>2</sub>(stearyl)), 28.72 (2C, CH<sub>2</sub>(stearyl)), 28.09 (1C, NHCHCH<sub>2</sub>), 26.71 (1C, OCH<sub>2</sub>CH<sub>2</sub>), 26.68 (1C, OCH<sub>2</sub>CH<sub>2</sub>), 25.40 (1C, OCH<sub>2</sub>CH<sub>2</sub>CH<sub>2</sub>), 25.36 (1C, OCH<sub>2</sub>CH<sub>2</sub>CH<sub>2</sub>), 22.18 (2C, CH<sub>2</sub>CH<sub>3</sub>), 13.61 (2C, CH<sub>2</sub>CH<sub>3</sub>). HRMS, ESI<sup>+</sup>, m/z: Calcd for C<sub>41</sub>H<sub>78</sub>NO<sub>4</sub> [M+H]<sup>+</sup>, 648.5931; found, 648.5932.

#### 1.2 Synthesis of OA2-Glu-Lys(Boc)<sub>2</sub>

A stirred solution of Boc-Lys(Boc)-OH (484 mg, 2.085 mmol) in chloroform (30 mL) at 0°C was added with EDCI (639 mg, 3.335 mmol) and HOBT (451 mg, 3.335

mmol) followed by stirring for 3 h at room temperature to obtain the reaction solution **A**. Next, a stirred solution of OA2-Glu (1.35 g, 2.085 mmol) in chloroform (20 mL) was added with triethylamine (872  $\mu$ L, 6.254 mmol) followed by stirring for 1 h at room temperature to obtain the reaction solution **B**, which was slowly dripped into the reaction solution **A** to stir at room temperature overnight. The reaction mixture was sequentially washed with certain amount of water, 10% citric acid aqueous solution, and saturated brine, and then dried over anhydrous  $\text{Na}_2\text{SO}_4$ , followed by filtration and concentration. The residue was purified by silica gel column chromatography eluting with petroleum ether: ethyl acetate = 7:1, and dried to obtain the compound as a colorless transparent oily liquid (721 mg, 35.4% yield).  $^1\text{H}$  NMR (300 MHz,  $\text{CDCl}_3$ ):  $\delta$  (ppm) 6.82 (brs, 1H, BocNH), 5.45-5.27 (m, 4H,  $\text{CH}_2\text{CHCHCH}_2$ ), 5.16 (brs, 1H, BocNH), 4.71 (brs, 1H, BocNHCH), 4.63-4.55 (m, 1H, NHCH), 4.12 (t,  $J = 6.9$  Hz, 2H,  $\text{COOCH}_2$ ), 4.05 (t,  $J = 6.5$  Hz, 2H,  $\text{COOCH}_2$ ), 3.15-3.07 (brs, 2H,  $\text{NHCH}_2$ ), 2.49-2.29 (m, 2H,  $\text{CH}_2\text{CO}$ ), 2.27-2.15 (m, 1H,  $\text{NHCHCH}_2$ ), 2.06-1.92 (m, 8H,  $\text{CH}_2\text{CHCHCH}_2$ ), 1.88-1.78 (m, 1H,  $\text{NHCHCH}_2$ ), 1.73-1.54 (m, 4H,  $\text{COOCH}_2\text{CH}_2$ , 2H,  $\text{NHCH}_2\text{CH}_2\text{CH}_2\text{CH}_2$ ), 1.46-1.42 (m, 18H,  $\text{C}(\text{CH}_3)_3$ , 2H,  $\text{NHCH}_2\text{CH}_2$ ), 1.35-1.24 (m, 44H,  $\text{CH}_2(\text{stearyl})$ , 2H,  $\text{NHCH}_2\text{CH}_2\text{CH}_2$ ), 0.88 (t,  $J = 6.9$  Hz, 6H,  $\text{CH}_2\text{CH}_3$ ).  $^{13}\text{C}$  NMR (75 MHz,  $\text{CDCl}_3$ ):  $\delta$  (ppm) 172.41 (1C,  $\text{CH}_2\text{COOCH}_2$ ), 171.54 (1C,  $\text{NHCHCO}$ ), 171.16 (1C,  $\text{CHCONH}$ ), 155.66 (1C,  $(\text{CH}_3)_3\text{COCO}$ ), 155.19 (1C,  $(\text{CH}_3)_3\text{COCO}$ ), 129.47 (2C,  $\text{CH}_2\text{CHCHCH}_2$ ), 129.26 (2C,  $\text{CH}_2\text{CHCHCH}_2$ ), 94.60 (2C,  $\text{C}(\text{CH}_3)_3$ ), 65.32 (1C,  $\text{COOCH}_2$ ), 66.45 (1C,  $\text{COOCH}_2$ ), 53.82 (1C, BocNHCH), 51.19 (1C, NHCH), 39.34 (1C,  $\text{NHCH}_2$ ), 32.11 (1C,  $\text{CH}_2\text{COOCH}_2$ ), 31.40 (2C,  $\text{CH}_2\text{CH}_2\text{CH}_3$ ), 29.71 (1C,  $\text{NHCH}_2\text{CH}_2$ ), 29.26 (4C,  $\text{CH}_2\text{CHCHCH}_2$ ), 29.20 (1C,  $\text{CH}_2(\text{stearyl})$ ), 29.16 (1C,  $\text{CH}_2(\text{stearyl})$ ), 29.02 (2C,  $\text{CH}_2(\text{stearyl})$ ), 28.94 (2C,  $\text{CH}_2(\text{stearyl})$ ), 28.82 (8C,  $\text{CH}_2(\text{stearyl})$ ), 28.74 (2C,  $\text{CH}_2(\text{stearyl})$ ), 28.07 (1C,  $\text{NHCHCH}_2$ ), 27.94 (3C,  $(\text{CH}_3)_3\text{C}$ ), 27.80 (3C,  $(\text{CH}_3)_3\text{C}$ ), 26.80 (1C,  $\text{NHCH}_2\text{CH}_2\text{CH}_2\text{CH}_2$ ), 26.70 (2C,  $\text{OCH}_2\text{CH}_2$ ), 25.39 (1C,  $\text{OCH}_2\text{CH}_2\text{CH}_2$ ), 25.30 (1C,  $\text{OCH}_2\text{CH}_2\text{CH}_2$ ), 22.18 (2C,  $\text{CH}_2\text{CH}_3$ ), 21.95 (1C,  $\text{NHCH}_2\text{CH}_2\text{CH}_2$ ), 13.62 (2C,  $\text{CH}_2\text{CH}_3$ ). HRMS, ESI $^+$ ,  $m/z$ : Calcd for  $\text{C}_{57}\text{H}_{105}\text{N}_3\text{O}_9\text{Na}$   $[\text{M}+\text{Na}]^+$ , 998.7749; found, 998.7747.

### 1.3 Synthesis of compound OA2

4.0 M HCl/1,4-dioxane solution (30 mL) was slowly dripped into the OA2-Glu-Lys (Boc)<sub>2</sub> (481 mg, 0.493 mmol) at 0°C. The reaction solution was concentrated and purified to obtain a yellow gelatinous solid with a yield of 80.2% (335 mg, 80.2% yield). <sup>1</sup>H NMR (500 MHz, CDCl<sub>3</sub>): δ (ppm) 8.21 (brs, 2H, NH<sub>2</sub>), 7.87 (brs, 2H, NH<sub>2</sub>), 5.40-5.30 (m, 4H, CH<sub>2</sub>CHCHCH<sub>2</sub>), 4.55-4.39 (m, 1H, NH<sub>2</sub>CH), 4.14-3.99 (m, 4H, COOCH<sub>2</sub>), 3.27-3.08 (m, 1H, NH<sub>2</sub>CH), 2.68-2.40 (m, 2H, NH<sub>2</sub>CH<sub>2</sub>), 2.19-2.10 (m, 2H, CH<sub>2</sub>CO), 2.08-1.93 (m, 8H, CH<sub>2</sub>CHCHCH<sub>2</sub>, 2H, NHCHCH<sub>2</sub>), 1.76-1.55 (m, 4H, COOCH<sub>2</sub>CH<sub>2</sub>, 2H, NHCH<sub>2</sub>CH<sub>2</sub>CH<sub>2</sub>CH<sub>2</sub>), 1.36-1.25 (m, 44H, CH<sub>2</sub>(stearyl), 2H, NH<sub>2</sub>CH<sub>2</sub>CH<sub>2</sub>CH<sub>2</sub>, 2H, NH<sub>2</sub>CH<sub>2</sub>CH<sub>2</sub>), 0.88 (t, J = 7.1 Hz, 6H, CH<sub>2</sub>CH<sub>3</sub>). <sup>13</sup>C NMR (125 MHz, CDCl<sub>3</sub>): δ (ppm) 173.32 (1C, CH<sub>2</sub>COOCH<sub>2</sub>), 171.44 (1C, NHCHCO), 169.47 (1C, CHCONH), 129.91 (2C, CH<sub>2</sub>CHCHCH<sub>2</sub>), 129.69 (2C, CH<sub>2</sub>CHCHCH<sub>2</sub>), 65.95 (1C, COOCH<sub>2</sub>), 65.17 (1C, COOCH<sub>2</sub>), 53.19 (1C, NH<sub>2</sub>CH), 52.31 (1C, NHCH), 39.68 (1C, NH<sub>2</sub>CH<sub>2</sub>), 32.60 (1C, CH<sub>2</sub>COOCH<sub>2</sub>), 31.88 (2C, CH<sub>2</sub>CH<sub>2</sub>CH<sub>3</sub>), 30.87 (1C, NH<sub>2</sub>CH<sub>2</sub>CH<sub>2</sub>CH<sub>2</sub>CH<sub>2</sub>), 29.81 (2C, CH<sub>2</sub>(stearyl)), 29.75 (4C, CH<sub>2</sub>CHCHCH<sub>2</sub>), 29.66 (2C, CH<sub>2</sub>(stearyl)), 29.57 (2C, CH<sub>2</sub>(stearyl)), 29.51 (2C, CH<sub>2</sub>(stearyl)), 29.38 (2C, CH<sub>2</sub>(stearyl)), 29.36 (2C, CH<sub>2</sub>(stearyl)), 29.30 (2C, CH<sub>2</sub>(stearyl)), 29.29 (2C, CH<sub>2</sub>(stearyl)), 28.67 (1C, NHCHCH<sub>2</sub>), 27.24 (1C, NH<sub>2</sub>CH<sub>2</sub>CH<sub>2</sub>), 27.21 (2C, OCH<sub>2</sub>CH<sub>2</sub>), 25.99 (2C, OCH<sub>2</sub>CH<sub>2</sub>CH<sub>2</sub>), 22.64 (2C, CH<sub>2</sub>CH<sub>3</sub>), 21.55 (1C, NH<sub>2</sub>CH<sub>2</sub>CH<sub>2</sub>CH<sub>2</sub>), 14.06 (2C, CH<sub>2</sub>CH<sub>3</sub>). HRMS, ESI<sup>+</sup>, m/z: Calcd for C<sub>47</sub>H<sub>90</sub>N<sub>3</sub>O<sub>5</sub> [M+H]<sup>+</sup>, 776.6880; found, 776.6860.
